1 ***Enterococcus faecium* genome dynamics during long-term asymptomatic**  
2 **patient gut colonization**

3

4

5 Jumamurat R. Bayjanov<sup>1, a</sup>, Jery Baan<sup>1, a</sup>, Malbert R.C. Rogers<sup>1</sup>, Annet Troelstra<sup>1</sup>, Rob  
6 J.L. Willems<sup>1</sup>, Willem van Schaik<sup>1, 2\*</sup>

7

8 <sup>1</sup> Department of Medical Microbiology, University Medical Center Utrecht, 3584CX  
9 Utrecht, The Netherlands

10 <sup>2</sup> Institute of Microbiology and Infection, College of Medical and Dental Sciences,  
11 University of Birmingham, Birmingham, United Kingdom

12

13 <sup>a</sup> indicates equal author contributions

14 \* Corresponding author; email: [w.vanschaik@bham.ac.uk](mailto:w.vanschaik@bham.ac.uk)

15

16 **Abstract**

17

18 Background

19 *E. faecium* is a gut commensal of humans and animals. In addition, it has recently  
20 emerged as an important nosocomial pathogen through the acquisition of genetic  
21 elements that confer resistance to antibiotics and virulence. We performed a whole-  
22 genome sequencing based study on 96 multidrug-resistant *E. faecium* strains that  
23 asymptotically colonized five patients with the aim to describe the genome  
24 dynamics of this species.

25

26 Results

27 The patients were hospitalized on multiple occasions and isolates were collected over  
28 periods ranging from 15 months to 6.5 years. Ninety-five of the sequenced isolates  
29 belonged to *E. faecium* clade A1, which was previously determined to be responsible  
30 for the vast majority of clinical infections. The clade A1 strains clustered into six clonal  
31 groups of highly similar isolates, three of which entirely consisted of isolates from a  
32 single patient. We also found evidence of concurrent colonization of patients by  
33 multiple distinct lineages and transfer of strains between patients during  
34 hospitalisation. We estimated the evolutionary rate of two clonal groups that colonized  
35 a single patient at 12.6 and 25.2 single nucleotide polymorphisms  
36 (SNPs)/genome/year. A detailed analysis of the accessory genome of one of the clonal  
37 groups revealed considerable variation due to gene gain and loss events, including the  
38 chromosomal acquisition of a 37 kbp prophage and the loss of an element containing  
39 carbohydrate metabolism-related genes. We determined the presence and location of  
40 twelve different Insertion Sequence (IS) elements, with *ISEfa5* showing a unique  
41 pattern of location in 24 of the 25 isolates, suggesting widespread *ISEfa5* excision and  
42 insertion into the genome during gut colonization.

43

44 Conclusions

45 Our findings show that the *E. faecium* genome is highly dynamic during asymptomatic  
46 colonization of the patient gut. We observe considerable genomic flexibility due to  
47 frequent horizontal gene transfer and recombination, which can contribute to the  
48 generation of genetic diversity within the species and, ultimately, can contribute to its  
49 success as a nosocomial pathogen.

## 50 **Background**

51

52 In recent decades, *Enterococcus faecium* has emerged as an important multidrug-  
53 resistant nosocomial pathogen. It is a major cause of hospital-acquired infections such  
54 as bacteraemia, urinary tract infection and endocarditis [1–4]. Furthermore,  
55 enterococcal infections contribute to patient mortality, increased length of hospital stay  
56 of patients and higher healthcare costs [5]. Infections caused by *E. faecium* are difficult  
57 to treat due to the large repertoire of acquired antibiotic resistance determinants, of  
58 which vancomycin resistance is arguably the most problematic [6, 7].

59

60 The species *E. faecium* consists of distinct subpopulations or 'clades' [8–10]. A deep  
61 phylogenetic split distinguishes clades A and B from each other [11], with clade B  
62 containing most human commensal isolates. Clade A was further sub-divided in clade  
63 A1 and A2 [8]. Clade A1 contains the vast majority of strains isolated from clinical  
64 settings, and overlaps with the previously identified *E. faecium* sub-population Clonal  
65 Complex 17 [9, 12]. The polyphyletic clade A2 is enriched for strains that were isolated  
66 from domestic animals and livestock [8, 10]. While vancomycin resistance can be  
67 found among strains from both clade A1 and clade A2, clade A1 strains are almost  
68 always resistant to ampicillin, while strains from other clades are mostly ampicillin-  
69 susceptible [12].

70

71 *E. faecium* is a genetically dynamic organism with an open pan-genome [8, 13, 14].  
72 Genomic changes in *E. faecium* are mostly driven by recombination and horizontal  
73 gene transfer (HGT), rather than by mutation [15]. Due to frequent HGT, *E. faecium*  
74 strains that have highly similar core genomes can have substantial differences in their  
75 accessory genomes [8, 14, 16]. Insertion Sequence (IS) elements are abundant in *E.*  
76 *faecium* genome [16]. IS elements are short transposable segments of DNA that can

77 have an important role in shaping a bacterial genome. Insertion events can lead to  
78 disruption of promoters, coding sequences or operon structures. In addition, they can  
79 catalyze genomic rearrangements including deletions, inversions, and duplications in  
80 bacterial genomes [17]. Complete genome sequences revealed that dozens of IS  
81 elements are scattered around the chromosome and plasmids of clinical *E. faecium*  
82 isolates [18, 19]. A number of IS elements, most notably IS16, are associated with  
83 clade A1 strains and have been hypothesized to contribute to the adaptation of *E.*  
84 *faecium* to the hospital environment [8, 16].

85

86 Patients that have been hospitalized for prolonged periods of time are potential  
87 reservoirs for drug-resistant *E. faecium* strains. Generally, infection by *E. faecium* is  
88 preceded by asymptomatic gut colonization by a resistant clade A1 strain [20, 21].  
89 Patients that have been colonized by *E. faecium* can contaminate both their immediate  
90 surroundings and healthcare workers, leading to outbreaks [21, 22]. The ability of *E.*  
91 *faecium* to survive on inanimate objects creates an environmental reservoir of  
92 multidrug-resistant strains in hospital wards and makes outbreaks with *E. faecium* a  
93 challenge to control [23].

94

95 Recent studies have used whole-genome sequencing (WGS) to trace transmission  
96 events of *E. faecium* between patients in hospital wards and between hospitals [10,  
97 24, 25]. Recently, the relatedness of *E. faecium* strains from bloodstream infections,  
98 the gut and the immediate environment of four patients that were hospitalized for up to  
99 two months was studied using WGS [21]. Here, we present an analysis of the genome  
100 dynamics of vancomycin- and ampicillin-resistant *E. faecium* during asymptomatic gut  
101 colonization of five patients for periods ranging from 15 months to 6.5 years. We  
102 describe the evolutionary trajectories, including the roles of gene gain and loss events,  
103 and IS-element excision and insertion that shape the genome of *E. faecium*.

104

## 105 **Results**

106

### 107 **Isolate collection and patient hospital stay**

108 This study used vancomycin- and ampicillin-resistant *E. faecium* (VRE and ARE,  
109 respectively) isolates that were collected and stored in the period 2001 - 2008 as part  
110 of routine diagnostics and infection prevention interventions at the University Medical  
111 Center Utrecht, the Netherlands (figure 1). Analysis of the collected isolates with  
112 anonymized patient data, showed that for five patients multidrug-resistant *E. faecium*  
113 isolates were collected over a period of >1 year. We sequenced the genomes of 96  
114 isolates, all of which were determined to be ampicillin-resistant using a previously  
115 described method [26]. Using Abricate [27], we found that 38 and 21 isolates carried  
116 the *vanA* or *vanB* operon. Further information on the antibiotic resistance profiles of  
117 the strains sequenced in this study is provided in Supplementary Table 1. The time  
118 span between the first and the last isolate collected from a single patient ranges from  
119 15 months (patient B) to 6.5 years (patient C).

120

### 121 **Genetic diversity of *E. faecium* patient isolates**

122 To be able to place the collected isolates in the larger *E. faecium* population, we  
123 created a SNP-based, recombination-filtered phylogenetic tree using the 96 genomes  
124 sequenced in this study and 70 previously described *E. faecium* genome sequences  
125 that represent the global *E. faecium* population [8]. This phylogenetic tree is based on  
126 1448 core genes and a total of 77,909 SNPs. Out of the 96 patient isolates, 95  
127 clustered into clade A1, a clade of hospital-associated *E. faecium* strains  
128 (Supplementary figure 1). The remaining isolate clustered with strains that were  
129 previously assigned to clade A2.

130

131 The relatively large diversity of the 70 publicly available *E. faecium* genome  
132 sequences, limited the resolution of the phylogenetic relationships between the patient

133 isolates. We therefore created a second tree, with only the 95 clade A1 patient isolates  
134 in this study, supplemented with 19 genome sequences of clade A1 strains that were  
135 previously sequenced [8]. This tree was based on 1805 core genes, with 5092 SNPs  
136 and allowed us to accurately interpret the similarities between the hospital isolates  
137 (figure 2). The phylogenetic tree of the clade A1 strains revealed 6 groups of closely  
138 related isolates. Three of these groups (1, 2 and 3) contained only isolates from a  
139 single patient (A, B and D, respectively). While additional isolates of patients B and D  
140 were present in other groups, patient A isolates clustered exclusively in group 1. In  
141 group 4, isolates clustered closely together despite being from three different patients  
142 (B, C and E). By analysis of dates and locations of hospitalization of these patients,  
143 we found that patients B, C and E were simultaneously present in a hospital ward  
144 (figure 1b), suggesting that we captured a small outbreak with this set of isolates.  
145 Groups 5 and 6 are two small, highly similar clusters of isolates. The isolates in group  
146 5 originate from 3 patients (C, D, E) which were isolated between October 2003 and  
147 February 2004. In group 6, isolates from patients C and E that were isolated between  
148 September 2007 and January 2008 cluster together. Both of these groups may thus  
149 also reflect transmission of strains between different patients.

150

151 We also found that patients can be colonized by different populations of *E. faecium* at  
152 the same time, as shown by the genetic diversity found in strains that were isolated on  
153 the same date, e.g. those on 4 February 2004 (D\_040204\_23, D\_040204\_24 and  
154 D\_040204\_25).

155

156 We determined whether a temporal signal is present in the *E. faecium* genome  
157 sequences in each individual group. The temporal signal was defined using Path-O-  
158 Gen [28], which plots the time at which each isolate was identified versus the distance  
159 to the root of the tree. A temporal signal ( $R^2 > 0.3$ ), was only found in groups 1 and 4.  
160 Analysis by BEAST resulted in estimated mutation rates for groups 1 and 4 of  $4.2 \times 10^{-}$

161 <sup>6</sup> (with 95% highest posterior density (HPD) of [ $2.2 \times 10^{-6}$ ,  $6.3 \times 10^{-6}$ ]) and  $8.4 \times 10^{-6}$   
162 (with 95% HPD of [ $4.7 \times 10^{-6}$ ,  $1.2 \times 10^{-5}$ ]) substitutions per nucleotide per year, being  
163 equivalent to 12.6 (6.6 - 19.8) SNPs/genome/year and 25.2 (14.1 - 36.0)  
164 SNPs/genome/year, respectively. The lack of temporal signal in groups 2, 3, 5, and 6  
165 is likely caused by the relatively low number of strains in these groups. Because all  
166 group 1 isolates originate from the same patient, they provide a unique opportunity to  
167 study the genome dynamics of *E. faecium* during long-term asymptomatic patient gut  
168 colonization. Hence, we focused further analyses on the strains from this group.

169

### 170 **The accessory genome of group 1 strains**

171 A total of 74 orthologous genes (OGs) were found to be differentially present in the  
172 genomes of the group 1 isolates (figure 3a). Hierarchical clustering showed that most  
173 of the OGs were part of larger groups of OGs that showed the same presence-absence  
174 pattern across the genome sequences, suggesting that they are genetically linked.  
175 Further analysis revealed that the clustered OGs were co-located on contigs.

176

177 The two largest variably present clusters are phage-related OGs (cluster 1), and OGs  
178 related to carbohydrate metabolism (cluster 2). Cluster 1 contains 24 OGs, of which  
179 10 are annotated as being hypothetical proteins. The annotations of the remaining  
180 genes suggested a phage origin of this element as they included tail and terminase  
181 protein-encoding genes (figure 3a). Cluster 2 comprised several genes that are related  
182 to carbohydrate transport. Neither of the clusters contained genes related to  
183 antimicrobial resistance.

184

185 When aligning these gene clusters to the original collection of 166 genomes (96  
186 genomes sequenced in this study and 70 genomes representing global *E. faecium*  
187 diversity) using BLAST, we find that they are mostly found in the newly sequenced  
188 isolates (Supplementary figure 1), with cluster 1 being found in 42 genomes, of which



189 38 were sequenced as part of this study. Cluster 2 was present in 28 genomes, of  
190 which 26 were sequenced here.

191

192 To further investigate the genetic linkage of these variably present clusters in the  
193 accessory genome of group 1 strains, we fully sequenced the genome of isolate  
194 A\_020709\_82, combining Illumina reads with long reads generated via Oxford  
195 Nanopore's MinION platform to complete the genome assembly. The A\_020709\_82  
196 strain has most of the genes of the accessory genome that are variably present among  
197 group 1 strains, including the two largest groups of OGs. The A\_020709\_82 strain has  
198 a chromosome of 2,740,566 nucleotides and 4 plasmids, ranging in size from 222 kbp  
199 to 4 kbp (figure 3b). By mapping all the differentially present OGs onto the  
200 A\_020709\_82 reference genome sequence, we found that the clustered OGs were  
201 located in close proximity to one another in the chromosome. A third, smaller variably  
202 present cluster consisting of 4 OGs, was found to be representing a 4.1 kbp plasmid  
203 that is lost in its entirety in 4 of the isolates, in a presence/absence pattern unrelated  
204 to that of the two larger clusters. To assess whether the differences in accessory  
205 genome sequences influence the fitness of the 25 group 1 isolates, we determined  
206 their *in vitro* maximum growth rates but found no statistically significant differences  
207 between the strains with different accessory genomes (Supplementary Figure 2).

208

### 209 **Dynamics of IS elements in a clonal *E. faecium* population**

210 We identified 12 different IS elements in the genome of A\_020709\_82. To identify the  
211 diversity and location of IS elements in the other strains from group 1, we used  
212 ISmapper [29] with the A\_020709\_82 genome as a reference and the sequencing  
213 reads of the other genomes in group 1 (figure 4). The positions of two IS elements  
214 (IS16 and IS6770) are fixed in all 25 isolates. The IS-element *ISEfa5* exhibited a  
215 particularly large diversity, having between 17 and 27 copies per genome. Twenty-four  
216 out of the 25 isolates in group 1 have a unique pattern, suggesting frequent excision

217 and integration events of this IS element. The remaining 9 IS elements showed an

218 intermediate amount of diversity.

219

## 220 Discussion

221

222 In this study, we use a collection of *E. faecium* carriage strains that were isolated from  
223 patients that were repeatedly admitted to a hospital over a time period ranging from 15  
224 months to 6.5 years. Out of 96 isolates, 95 clustered to the hospital-associated A1  
225 clade, which is expected given their source as ampicillin-resistant clade A1 strains  
226 cause the majority of hospital-acquired infections, and are rarely carried by humans in  
227 community settings [8, 30]. The patients likely acquired these isolates during their  
228 hospital stay and were carriers for extended periods of time. Previous work has shown  
229 that ampicillin-resistant *E. faecium* clones can persist in the gut microbiota for several  
230 months after discharge from hospital [31], during which time further spread can occur.

231

232 The mutation rate we find in both the clonal group 1 and non-clonal group 4 (12.6 and  
233 25.2 substitutions/genome/year, respectively) are in line with previously described  
234 values for similar *E. faecium* populations [13, 32]. Others have described rates of up  
235 to one order of magnitude higher [8, 21, 25]. This difference is postulated to be caused  
236 by increased genetic drift within patients along with a limited time for purifying selection  
237 to act on a population, leading to the incomplete removal of strains with mildly  
238 deleterious mutations [21, 33]. Our group 1 estimation in particular can be assumed to  
239 be a better approximation of the background mutation rate of *E. faecium* given their  
240 clonality, the absence of enterococcal disease in the source patient, and the longer  
241 time over which they were collected. However, it is also possible that the large  
242 differences in the mutation rate of different *E. faecium* clones reported in literature are  
243 a true biological signal. As in the Gram-negative gut commensal *E. coli*, *E. faecium*  
244 clones with a higher mutation rate may be able to more rapidly adapt to novel  
245 environments while negatively impacting their transmissibility and ability to recolonize  
246 similar hosts [34].

247

248 The pangenome of *E. faecium* has previously been determined to be essentially open,  
249 meaning that it can easily acquire novel genes by horizontal gene transfer [8, 14]. This  
250 ability to acquire DNA was recently vividly illustrated by the description of a bovine *E.*  
251 *faecium* strain that had acquired a gene cluster encoding a botulinum-like neurotoxin  
252 [35]. In group 1 strains we observed a number of gene gain and loss events. The  
253 earliest isolates in group 1 carry a gene cluster that is predicted to be involved in  
254 carbohydrate metabolism, while later strains lose this element and acquire a phage.  
255 Five isolates carry both the phage element and the carbohydrate metabolism gene  
256 cluster, which shows that carriage of both elements is not mutually exclusive. While we  
257 did not observe differences in the *in vitro* growth rates of strains with different  
258 combinations of the carbohydrate metabolism and phage element, their presence  
259 might affect the strains' fitness in colonizing gut of this patient. It is possible that the  
260 changes in the accessory genome allow the clone to optimally adapt to colonize in the  
261 context of the patient's gut microbiota.

262

263 As described in previous studies, there is an abundance of IS elements in the *E.*  
264 *faecium* genome [16]. We find that some IS elements, such as IS256, IS6770 and the  
265 clade A1-associated IS16 [8], show little to no variation in insertion location and number  
266 in the genomes of patient A isolates. IS16 was previously proposed to confer a degree  
267 of genomic flexibility to the hospital-adapted sub-population of *E. faecium* that could  
268 contribute to its success as a nosocomial pathogen[16]. However, the fixed position of  
269 IS16 in the group A isolates appears to contradict a major role for this IS element in  
270 shaping the *E. faecium* genome. It may be more likely that IS16 has entered the *E.*  
271 *faecium* population when the hospital-adapted sub-population (clade A1) first emerged  
272 and has since been spreading vertically in this population. Conversely, we find a large  
273 number of ISEfa5 copies in the genome of group 1 strains and evidence for frequent  
274 excision and insertion events. ISEfa5 was first described as part of Tn1546-like  
275 elements, which are responsible for VanA-type vancomycin resistance, in South

276 American *E. faecium* isolates [36, 37], but it was later found in European [38] and  
277 Australian strains [39] as well. In the whole genome sequence of strain Aus0085 25  
278 copies of *ISEfa5* were found [39]. Its high copy number in *E. faecium* strains and the  
279 evidence provided in this study for frequent integration and excision events, suggests  
280 that *ISEfa5* may be contributing significantly to the genomic flexibility of the species.

281

282 Our observation that patients can be colonized by multiple strains simultaneously is in  
283 line with previous studies [21, 33, 40]. Concurrent colonization by multiple clones can  
284 have an important impact on infection prevention efforts if only single colonies are  
285 selected for further typing. Potentially pathogenic or multidrug-resistant strains can  
286 then be inadvertently missed, leading to the erroneous reconstruction of transmission  
287 networks. When isolates are missed, transmission networks may also be  
288 reconstructed erroneously [21], making outbreak control more challenging. This is  
289 illustrated by the small outbreak we detected in our dataset, where patients B, C and  
290 E appear to be colonized by isolates with high inter-patient similarity, as well as more  
291 different ones. Sampling and typing of multiple colonies when performing screening for  
292 colonization by multi-drug resistant *E. faecium* is thus required to capture the full within-  
293 patient diversity of this organism. In addition, the use of metagenomic shotgun  
294 sequencing, combined with tools to reconstruct microbial genomes and resolve strains  
295 [41] may become a useful alternative to culture-based approaches to determine the  
296 presence of different *E. faecium* clones in the gut microbiome.

297

298 **Conclusions**

299

300 Our findings show that the *E. faecium* genome is highly dynamic during asymptomatic  
301 colonization of the patient gut. We demonstrate *E. faecium*'s remarkable genomic  
302 flexibility, which is characterized by frequent gene gain and gene loss due to horizontal  
303 gene transfer and recombination and the movement of IS elements. The ability of *E.*  
304 *faecium* to rapidly diversify may contribute to its success as a nosocomial pathogen as  
305 it allows clones that circulate in a hospital to rapidly optimize their ability to effectively  
306 colonize individual patients that may differ in their underlying illnesses, antibiotic  
307 therapy and composition of the gut microbiota. Improving our understanding of the  
308 mechanisms that underpin this trait is crucial for combating the issues related to the  
309 emergence of multidrug-resistant *E. faecium* as an important nosocomial pathogen.

310

311 **Methods**

312

313 **Strain collection**

314 Ninety-six *E. faecium* strains were isolated from five patients during routine diagnostic  
315 screenings at the University Medical Center Utrecht, a tertiary care facility in Utrecht,  
316 the Netherlands, as part of routine screening for colonization by multidrug-resistant *E.*  
317 *faecium* [26, 42]. Patients were screened for carriage of multidrug-resistant *E. faecium*  
318 by culturing rectal swabs in Enterococcosel broth (Becton Dickinson) supplemented  
319 with aztreonam (75 mg/liter) at 37°C. If the cultures exhibited black colorization within  
320 48 h, the broth was streaked on an Enterococcosel Agar plate (Becton Dickinson),  
321 supplemented with aztreonam and vancomycin (25 mg/liter) or with aztreonam and  
322 ampicillin (16 mg/liter) and incubated at 37°C for 48 h. Black colonies formed by Gram-  
323 positive cocci were subjected to multiplex PCR to detect vancomycin resistance genes  
324 and the *esp* gene, as well as additional antibiotic susceptibility testing. If a vancomycin-  
325 and/or an ampicillin-resistant isolate was found during a screening, this isolate was  
326 subsequently stored at -80°C. These patients were selected due to their relatively high  
327 number of available screening isolates (between 17 and 25 per patient). One patient  
328 (patient C) was admitted to the hospital for recurring abscesses on the upper leg, the  
329 other four patients were admitted for (hemo)dialysis procedures. None of the patients  
330 were diagnosed with enterococcal infections.

331

332 **Growth curves and maximum growth rate**

333 A BioScreen C instrument (Oy Growth Curves AB) was used to measure bacterial  
334 growth. One colony was picked per strain and grown overnight in Brain Heart Infusion  
335 (BHI) broth at 37°C with shaking at 200 rpm, then diluted to an initial optical density  
336 at 600 nm (OD<sub>600</sub>) of 0.1 in BHI. The cultures were incubated in triplicate in the  
337 Bioscreen C system at 37°C with continuous shaking, and absorbance at 600 nm (A<sub>600</sub>)  
338 was recorded every 15 min for 9 hours. The growth rates ( $\mu$ ) were calculated using

339  $\mu = \frac{\ln(A_2) - \ln(A_1)}{(t_2 - t_1)}$ , where  $t_x$  signifies a time point and  $A_x$  the associated  $A_{600}$  at this time  
340 point. The maximum growth rate ( $\mu_{max}$ ) was determined for each individual experiment  
341 by taking the highest  $\mu$  over the course of the growth.

342

### 343 **DNA isolation, genome sequencing and assembly**

344 Genomic DNA of all strains was isolated from overnight cultures in Brain Heart Infusion  
345 broth, incubated at 37°C with shaking at 200 rpm, using the Wizard Genomic DNA  
346 purification kit (Promega). Library preparation for sequencing was done using the  
347 Nextera XT kit and 150 nucleotide paired-end sequencing was performed by  
348 Edinburgh Genomics on an Illumina HiSeq 2500. An additional 70 publicly available *E.*  
349 *faecium* genomes, described in [8], were also included in our analyses and were used  
350 to represent the global diversity of the species *E. faecium*. The Nesoni (version 0.122)  
351 tool [43] was used to remove adapter sequences and homopolymers, and to trim low-  
352 quality bases in sequence reads that had a quality score below 10. If more than half of  
353 a read was composed of low-quality bases, the read was discarded. The SPAdes  
354 assembler (version 3.1.0) [44] with *--careful* option and with k-mer sizes of 21, 31 and  
355 41 was used for genome assembly. From the resulting contigs, those with less than  
356 10-fold nucleotide coverage, as well as those smaller than 500 bases were discarded.

357

358 Assembly quality was checked using QUAST [45] and contigs not originating from  
359 bacteria (presumably due to low-level contamination of datasets with eukaryotic reads)  
360 were identified by aligning to NCBI GenBank database using BLASR+ (version 2.2.29)  
361 [46] and were removed.

362

363 The genome of strain A\_020709\_82 (GenBank accession number CP018128) was  
364 sequenced to serve as a reference for the analysis of the accessory genomes and  
365 distribution of IS elements in the genomes of the strains in group 1. DNA was prepared



366 as described above, and then prepared for sequencing according to the Genomic DNA  
367 sequencing for the MinION device protocol (Oxford Nanopore Technologies, March  
368 2016). From the obtained Pre-Sequencing Mix, approximately 60ng was loaded on a  
369 R7.3 flowcell and sequenced using an Oxford Nanopore MinION Mk1 instrument, which  
370 was run for a total of 48 hours with a Pre-Sequencing Mix top up (~60ng) at the 24-  
371 hour mark. A total of 18,629 high-quality two-directional (2D) reads were produced for  
372 a total of ~127 million bases. Poretools [47] was used to extract a fasta-format file  
373 containing the reads. A hybrid assembly using these reads combined with 2 x 150 bp  
374 HiSeq 2500 Illumina reads was then generated using SPAdes 3.7.0 [44] with the --  
375 nanopore option.

376

### 377 **Genome annotation and clustering of orthologous proteins**

378 We annotated the genome assemblies of all 166 isolates included in this study by using  
379 the Prokka [48] annotation tool (version 1.10) with its default parameters. To create  
380 clusters of orthologous proteins, the amino acid sequences of all genes in the 166  
381 genomes were aligned against themselves using BLAST+ (version 2.2.29) [46].  
382 Orthologous genes were identified with orthAgogue (version 1.0.3) [49] using the bit  
383 score information from the BLAST alignments, where aligned sequence length  
384 between two genes should at least be half of the size of the longer gene. Orthologous  
385 genes were grouped into OGs using the MCL algorithm (version 12-135) with the  
386 inflation parameter of 1.5 [50].

387

### 388 **Phylogenetic analyses**

389 We generated core genomes by concatenating the sequences of OGs that were  
390 present once in all genomes. To prevent bias in our data created by recombination, we  
391 filtered the core genomes to identify putative recombination regions using the Gubbins  
392 recombination filtering tool (version 1.3.4) [51]. We then used the SNPs in the core  
393 genome located outside of the identified recombination regions to create two

394 phylogenetic trees: one for all 166 strains (96 patient isolates and 70 publicly available  
395 genomes), and one for the 114 clade A1 strains (95 patient isolates and 19 clade A1  
396 isolates as defined in [8]), using FastTree2 (version 2.1.7; double precision mode  
397 enabled) [52]. We used a GTR substitution model for nucleotide sequences with a  
398 Gamma site evolutionary rate correction and 1000 bootstrap samples to estimate the  
399 support for bifurcation points.

400

401 We observed 6 different groups of strains among newly sequenced 96 strains based  
402 on their similarity in the tree of 114 clinical isolates. Each of these 6 groups was then  
403 analyzed separately. For each group of strains, OG clustering as well as recombination  
404 filtering was applied as described above. However, instead of using SNPs, a  
405 concatenated core genome containing all the core genes that are outside of  
406 recombination regions were used to obtain more accurate branch lengths and better  
407 estimates of time divergence in phylodynamic analysis [53].

408

#### 409 **Estimation of mutation rates**

410 To further analyze the evolutionary dynamics of each group of strains, we first checked  
411 for the presence of sufficient temporal signal ( $R^2 > 0.30$ ) using Path-O-Gen (version  
412 1.4pre) [28]. We then used the BEAST molecular evolutionary analysis tool (version  
413 1.8.2) [54] only for those groups that had a sufficient level of temporal signal.

414

415 We used jModelTest2 [55] to identify the substitution model and site heterogeneity  
416 model, and to estimate the proportion of invariant sites, the transition/transversion ratio  
417 and the shape parameter of the  $\Gamma$  distribution. Five different clock models (strict,  
418 exponential, log-normal, fixed and random) and three different demographic models  
419 (constant, log-normal and Bayesian-skyline plot) were used in the BEAST analysis.  
420 These different models were analyzed with 100 million Markov chain Monte Carlo

421 (MCMC) simulations with 10 million burn-ins, where sampling was done after every  
422 10,000 simulations. The best model among these 15 models (5 clock models x 3  
423 demographic models) was selected using path sampling (PS) and stepping-stone  
424 sampling (SS) model selection algorithms with one million simulations and 100 path  
425 steps, where logs after every 1000 simulations were screened as described previously  
426 [56]. Maximum clade credibility (MCC) tree was generated using TreeAnnotator using  
427 the median heights of trees [54]. The estimated prior values by jModelTest2 for  
428 substitution and heterogeneity models were HKY and I+G for both groups. The rest of  
429 the estimated coefficients were the same with the exception of the  
430 transition/transversion ratio being 6.79 and 3.88 for group 1 and 4, respectively. The  
431 best BEAST model for group 1 isolates was a lognormal relaxed clock (lognormal) with  
432 a constant coalescence model (lognormal-constant) based on SS model selection, and  
433 a lognormal relaxed clock with a Bayesian skyline (BS) coalescence model (lognormal-  
434 BS) based on the PS model selection. Although the SS model selection method is  
435 generally more accurate than the PS model selection method [57], we chose the  
436 lognormal-BS as the BS coalescence model had higher effective sample size values  
437 than the constant model; and the difference between lognormal-constant and  
438 lognormal-BS models was negligible. For group 4 strains, the best BEAST model was  
439 the lognormal relaxed clock with an exponential coalescence model according to both  
440 the SS and PS model selection methods.

441

#### 442 **Analysis of accessory genome**

443 Besides core-genome based analysis, we studied the differential presence of  
444 accessory genes within the six groups. When an OG was either present in less or  
445 absent in more than 90% of the strains in the group, it was included in the accessory  
446 genome. In addition to the annotation information, we also considered on which contigs  
447 differentially present genes were located in order to identify potential genetic links.  
448 Thus, we aligned the corresponding contigs of each differentially present gene against

449 the GenBank database using BLAST+ (version 2.2.29+) [46] to identify putative mobile  
450 elements on which the variably present genes were located. We aligned differentially  
451 present genes of group 1 to the A\_020709\_82 reference genome and visualized  
452 location of these genes on the reference using Circos (version 0.69) [58]. The two  
453 largest clusters were aligned to all 166 genomes using BLAST+ (version 2.2.29+) [46]  
454 to determine the presence/absence of these regions in *E. faecium*. Abricate [27] was  
455 used to determine the presence of antimicrobial resistance determinants in the  
456 assembled genomes.

457

#### 458 **Gain and loss of insertion sequences**

459 We used ISMapper [29] to find gain and loss of insertion sequence elements (IS  
460 elements) among group 1 strains, which solely includes isolates from the same patient  
461 (patient A). Sequences of IS elements were found by uploading the complete genome  
462 sequence of the A\_020709\_82 reference strain at the ISfinder [59] website. Sequences  
463 of the identified IS elements were used in ISMapper together with the sequence reads  
464 from patient isolates. The genome of the patient A strain A\_020709\_82 was used as a  
465 reference to which reads were aligned, positions of IS elements were ordered  
466 regarding their positions in the reference genome.

467

468

469

470 **List of abbreviations**

471

472 SNPs: single nucleotide polymorphisms

473 IS: insertion sequence

474 HGT: horizontal gene transfer

475 WGS: whole genome sequencing

476 ARE: ampicillin-resistant *E. faecium*

477 VRE: vancomycin-resistant *E. faecium*

478 HPD: highest posterior density

479 OGs: orthologous genes

480 BHI: Brain Heart Infusion

481 OD<sub>600</sub>: optical density at 600 nm (OD<sub>600</sub>)

482 A<sub>600</sub>: absorbance at 600 nm (A<sub>600</sub>)

483  $\mu$ : growth rate

484  $\mu_{max}$ : maximum growth rate

485 MCMC: Markov chain Monte Carlo (MCMC)

486 PS: path sampling

487 SS: stepping-stone sampling

488 MCC: maximum clade credibility

489 BS: Bayesian skyline

490 ENA: European Nucleotide Archive

491 ICU: Intensive Care Unit

492

493 **Declarations**

494

495 Ethics approval and consent to participate

496 Strains were isolated as part of routine diagnostic procedures during a VRE outbreak.

497 This aspect of the study did not require consent or ethical approval by an institutional

498 review board.

499

500 Consent for publication

501 Not applicable

502

503 Availability of data and material

504 Short read data for the 96 genomes sequenced in this study are available at the

505 European Nucleotide Archive (ENA), accession number PRJNA344739. The long-read

506 sequence dataset used for the assembly of the genome of strain A\_020709\_82 is

507 available at ENA, accession number CP018128.

508

509 Competing interests

510 The authors declare that they have no competing interests

511

512 Funding

513 This work was supported by a grant from the Netherlands Organization for Scientific

514 Research (VIDI: 917.13.357) and a Royal Society Wolfson Research Merit Award to

515 W.v.S. The funders had no role in study design, data collection and analysis, decision

516 to publish, or preparation of the manuscript.

517

518 Authors' contributions

519 W.v.S. designed the study. A.T. provided the strains. J.R.B., J.B., M.R.C.R. performed  
520 data analyses. J.R.B., J.B., R.J.L.W., and W.v.S. wrote the manuscript. All authors read  
521 and approved the final manuscript.

522

523 Acknowledgements

524 The authors wish to thank Mick Watson (Edinburgh Genomics, University of  
525 Edinburgh) for generating the Illumina sequence data used in this study.

526

527 **References**

528

529 1. Gao W, Howden BP, Stinear TP. Evolution of virulence in *Enterococcus faecium*, a  
530 hospital-adapted opportunistic pathogen. *Curr Opin Microbiol*. 2017;41:76–82.

531 2. Arias CA, Murray BE. The rise of the *Enterococcus*: beyond vancomycin  
532 resistance. *Nat Rev Microbiol*. 2012;10:266–78.

533 3. Mendes RE, Castanheira M, Farrell DJ, Flamm RK, Sader HS, Jones RN.  
534 Longitudinal (2001–14) analysis of enterococci and VRE causing invasive infections  
535 in European and US hospitals, including a contemporary (2010–13) analysis of  
536 oritavancin *in vitro* potency. *J Antimicrob Chemother*. 2016;71:3453–8.

537 4. de Kraker MEA, Jarlier V, Monen JCM, Heuer OE, van de Sande N, Grundmann  
538 H. The changing epidemiology of bacteraemias in Europe: trends from the European  
539 Antimicrobial Resistance Surveillance System. *Clin Microbiol Infect*. 2013;19:860–8.

540 5. Cheah ALY, Spelman T, Liew D, Peel T, Howden BP, Spelman D, et al.  
541 Enterococcal bacteraemia: Factors influencing mortality, length of stay and costs of  
542 hospitalization. *Clin Microbiol Infect*. 2013;19.

543 6. Miller WR, Murray BE, Rice LB, Arias CA. Vancomycin-resistant enterococci:  
544 therapeutic challenges in the 21st century. *Infect Dis Clin*. 2016;30:415–39.

545 7. Tacconelli E, Carrara E, Savoldi A, Harbarth S, Mendelson M, Monnet DL, et al.  
546 Discovery, research, and development of new antibiotics: the WHO priority list of  
547 antibiotic-resistant bacteria and tuberculosis. *Lancet Infect Dis*. 2018;18:318-327.

548 8. Lebreton F, van Schaik W, McGuire AM, Godfrey P, Griggs A, Mazumdar V, et al.  
549 Emergence of epidemic multidrug-resistant *Enterococcus faecium* from animal and  
550 commensal strains. *mBio*. 2013;4.

551 9. Guzman Prieto AM, van Schaik W, Rogers MRC, Coque TM, Baquero F, Corander  
552 J, et al. Global emergence and dissemination of enterococci as nosocomial  
553 pathogens: attack of the clones? *Frontiers in Microbiology*. 2016;7:788.

554 10. Raven KE, Reuter S, Reynolds R, Brodrick HJ, Russell JE, Török ME, et al. A  
555 decade of genomic history for healthcare-associated *Enterococcus faecium* in the  
556 United Kingdom and Ireland. *Genome Res*. 2016;26:1388–96.

557 11. Palmer KL, Godfrey P, Griggs A, Kos VN, Zucker J, Desjardins C, et al.  
558 Comparative genomics of enterococci: variation in *Enterococcus faecalis*, clade  
559 structure in *E. faecium*, and defining characteristics of *E. gallinarum* and *E.*  
560 *casseliflavus*. *mBio*. 2012;3:e00318-00311.

561 12. Willems RJL, Top J, Van Santen M, Robinson DA, Coque TM, Baquero F, et al.  
562 Global spread of vancomycin-resistant *Enterococcus faecium* from distinct  
563 nosocomial genetic complex. *Emerg Infect Dis*. 2005;11:821–8.

564 13. Howden BP, Holt KE, Lam MMC, Seemann T, Ballard S, Coombs GW, et al.  
565 Genomic insights to control the emergence of vancomycin-resistant enterococci.  
566 *mBio*. 2013;4: e00412-13.

567 14. van Schaik W, Top J, Riley DR, Boekhorst J, Vrijenhoek JEP, Schapendonk CME,  
568 et al. Pyrosequencing-based comparative genome analysis of the nosocomial



- 569 pathogen *Enterococcus faecium* and identification of a large transferable  
570 pathogenicity island. BMC Genomics. 2010;11:239.
- 571 15. De Been M, Van Schaik W, Cheng L, Corander J, Willems RJ. Recent  
572 recombination events in the core genome are associated with adaptive evolution in  
573 *Enterococcus faecium*. Genome Biol Evol. 2013;5:1524–35.
- 574 16. Leavis HL, Willems RJL, Van Wamel WJB, Schuren FH, Caspers MPM, Bonten  
575 MJM. Insertion sequence-driven diversification creates a globally dispersed emerging  
576 multiresistant subspecies of *E. faecium*. PLoS Pathog. 2007;3:0075–96.
- 577 17. Ooka T, Ogura Y, Asadulghani M, Ohnishi M, Nakayama K, Terajima J, et al.  
578 Inference of the impact of insertion sequence (IS) elements on bacterial genome  
579 diversification through analysis of small-size structural polymorphisms in *Escherichia*  
580 *coli* O157 genomes. Genome Res. 2009;19:1809–16.
- 581 18. Qin X, Galloway-Peña JR, Sillanpaa J, Roh JH, Nallapareddy SR, Chowdhury S,  
582 et al. Complete genome sequence of *Enterococcus faecium* strain TX16 and  
583 comparative genomic analysis of *Enterococcus faecium* genomes. BMC Microbiol.  
584 2012;12:135.
- 585 19. Lam MMC, Seemann T, Bulach DM, Gladman SL, Chen H, Haring V, et al.  
586 Comparative analysis of the first complete *Enterococcus faecium* genome. J  
587 Bacteriol. 2012;194:2334–41.
- 588 20. Ubeda C, Taur Y, Jenq RR, Equinda MJ, Son T, Samstein M, et al. Vancomycin-  
589 resistant *Enterococcus* domination of intestinal microbiota is enabled by antibiotic  
590 treatment in mice and precedes bloodstream invasion in humans. J Clin Invest.  
591 2010;120:4332–41.
- 592 21. Moradigaravand D, Gouliouris T, Blane B, Naydenova P, Ludden C, Crawley C, et  
593 al. Within-host evolution of *Enterococcus faecium* during longitudinal carriage and  
594 transition to bloodstream infection in immunocompromised patients. Genome Med.  
595 2017;9:119.
- 596 22. de Regt MJA, van der Wagen LE, Top J, Blok HEM, Hopmans TEM, Dekker AW,  
597 et al. High acquisition and environmental contamination rates of CC17 ampicillin-  
598 resistant *Enterococcus faecium* in a Dutch hospital. J Antimicrob Chemother.  
599 2008;62:1401–6.
- 600 23. Wendt C, Wiesenthal B, Dietz E, Rüden H. Survival of vancomycin-resistant and  
601 vancomycin-susceptible enterococci on dry surfaces. J Clin Microbiol. 1998;36:3734–  
602 6.
- 603 24. Raven KE, Gouliouris T, Parkhill J, Peacock SJ. Genome-based analysis of  
604 *Enterococcus faecium* bacteremia associated with recurrent and mixed strain  
605 infection. J Clin Microbiol. 2018;56: e01520-17.
- 606 25. Raven KE, Gouliouris T, Brodrick H, Coll F, Brown NM, Reynolds R, et al.  
607 Complex routes of nosocomial vancomycin-resistant *Enterococcus faecium*  
608 transmission revealed by genome sequencing. Clin Infect Dis. 2017;64:886–93.
- 609 26. Mascini EM, Troelstra A, Beitsma M, Blok HEM, Jalink KP, Hopmans TEM, et al.  
610 Genotyping and preemptive isolation to control an outbreak of vancomycin-resistant  
611 *Enterococcus faecium*. Clin Infect Dis. 2006;42:739-46

- 612 27. Seemann T. ABRicate. <https://github.com/tseemann/abricate>.
- 613 28. Rambaut A, Lam TT, Max Carvalho L, Pybus OG. Exploring the temporal  
614 structure of heterochronous sequences using TempEst (formerly Path-O-Gen). *Virus*  
615 *Evol.* 2016;2:vew007.
- 616 29. Hawkey J, Hamidian M, Wick RR, Edwards DJ, Billman-Jacobe H, Hall RM, et al.  
617 ISMapper: Identifying transposase insertion sites in bacterial genomes from short  
618 read sequence data. *BMC Genomics.* 2015;16:667.
- 619 30. van den Bunt G, Top J, Hordijk J, Greeff D, C S, Mughini-Gras L, et al. Intestinal  
620 carriage of ampicillin- and vancomycin-resistant *Enterococcus faecium* in humans,  
621 dogs and cats in the Netherlands. *J Antimicrob Chemother.* 2018;73:607-614.
- 622 31. Weisser M, Oostdijk EA, Willems RJ, Bonten MJ, Frei R, Elzi L, et al. Dynamics  
623 of ampicillin-resistant *Enterococcus faecium* clones colonizing hospitalized patients:  
624 data from a prospective observational study. *BMC Infect Dis.* 2012;12:68.
- 625 32. Duchêne S, Holt KE, Weill F-X, Le Hello S, Hawkey J, Edwards DJ, et al.  
626 Genome-scale rates of evolutionary change in bacteria. *Microb Genomics.*  
627 2016;2:e000094.
- 628 33. Didelot X, Walker AS, Peto TE, Crook DW, Wilson DJ. Within-host evolution of  
629 bacterial pathogens. *Nature Reviews Microbiology.* 2016;14:150-162.
- 630 34. Giraud A, Matic I, Tenailon O, Clara A, Radman M, Fons M, et al. Costs and  
631 benefits of high mutation rates: Adaptive evolution of bacteria in the mouse gut.  
632 *Science.* 2001;291:2606-2608.
- 633 35. Zhang S, Lebreton F, Mansfield MJ, Miyashita SI, Zhang J, Schwartzman JA, et  
634 al. Identification of a botulinum neurotoxin-like toxin in a commensal strain of  
635 *Enterococcus faecium*. *Cell Host and Microbe.* 2018;23:169-176.
- 636 36. Camargo ILBC, Zanella RC, Brandileone MCC, Pignatari ACC, Goldman GH,  
637 Woodford N, et al. Occurrence of insertion sequences within the genomes and  
638 Tn1546-like elements of glycopeptide-resistant enterococci isolated in Brazil, and  
639 identification of a novel element, ISEfa5. *Int J Med Microbiol.* 2005;294:513-9.
- 640 37. Khan MA, Northwood JB, Loor RGJ, Tholen ATR, Riera E, Falcón M, et al. High  
641 prevalence of ST-78 infection-associated vancomycin-resistant *Enterococcus*  
642 *faecium* from hospitals in Asunción, Paraguay. *Clin Microbiol Infect.* 2010;16:624-7.
- 643 38. Wardal E, Kuch A, Gawryszewska I, Żabicka D, Hryniewicz W, Sadowy E.  
644 Diversity of plasmids and Tn1546-type transposons among VanA *Enterococcus*  
645 *faecium* in Poland. *Eur J Clin Microbiol Infect Dis.* 2017;36:313-328.
- 646 39. Lam MMC, Seemann T, Tobias NJ, Chen H, Haring V, Moore RJ, et al.  
647 Comparative analysis of the complete genome of an epidemic hospital sequence  
648 type 203 clone of vancomycin-resistant *Enterococcus faecium*. *BMC Genomics.*  
649 2013;14:595
- 650 40. Raven KE, Gouliouris T, Parkhill J, Peacock SJ. Genome-based analysis of  
651 *Enterococcus faecium* bacteremia associated with recurrent and mixed-strain  
652 infection. *J Clin Microbiol.* 2018.

- 653 41. Segata N. On the Road to Strain-Resolved Comparative Metagenomics.  
654 mSystems. 2018.
- 655 42. Mascini EM, Jalink KP, Kamp-Hopmans TEM, Blok HEM, Verhoef J, Bonten  
656 MJM, et al. Acquisition and Duration of Vancomycin-Resistant Enterococcal Carriage  
657 in Relation to Strain Type. *J Clin Microbiol*. 2003.
- 658 43. Harrison P, Seemann T. From high-throughput sequencing read alignments to  
659 confident, biologically relevant conclusions with Neson. 2009.
- 660 44. Bankevich A, Nurk S, Antipov D, Gurevich AA, Dvorkin M, Kulikov AS, et al.  
661 SPAdes: A New Genome Assembly Algorithm and Its Applications to Single-Cell  
662 Sequencing. *J Comput Biol*. 2012;19:455–77.
- 663 45. Gurevich A, Saveliev V, Vyahhi N, Tesler G. QUAST: quality assessment tool for  
664 genome assemblies. *Bioinforma Oxf Engl*. 2013;29:1072–5.
- 665 46. Camacho C, Coulouris G, Avagyan V, Ma N, Papadopoulos J, Bealer K, et al.  
666 BLAST+: architecture and applications. *BMC Bioinformatics*. 2009;10:421.
- 667 47. Loman NJ, Quinlan AR. Poretools: A toolkit for analyzing nanopore sequence  
668 data. *Bioinformatics*. 2014;30:3399–401.
- 669 48. Seemann T. Prokka: Rapid prokaryotic genome annotation. *Bioinformatics*.  
670 2014;30:2068–9.
- 671 49. Ekseth OK, Kuiper M, Mironov V. OrthAogue: An agile tool for the rapid  
672 prediction of orthology relations. *Bioinformatics*. 2014;30:734–6.
- 673 50. Van Dongen S, Abreu-Goodger C. Using MCL to extract clusters from networks.  
674 *Methods Mol Biol*. 2012;804:281–95.
- 675 51. Croucher NJ, Page AJ, Connor TR, Delaney AJ, Keane JA, Bentley SD, et al.  
676 Rapid phylogenetic analysis of large samples of recombinant bacterial whole genome  
677 sequences using Gubbins. *Nucleic Acids Res*. 2015;43:e15.
- 678 52. Price MN, Dehal PS, Arkin AP. FastTree 2 - Approximately maximum-likelihood  
679 trees for large alignments. *PLoS ONE*. 2010;5.
- 680 53. Bertels F, Silander OK, Pachkov M, Rainey PB, Van Nimwegen E. Automated  
681 reconstruction of whole-genome phylogenies from short-sequence reads. *Mol Biol*  
682 *Evol*. 2014;31:1077–88.
- 683 54. Drummond AJ, Suchard MA, Xie D, Rambaut A. Bayesian phylogenetics with  
684 BEAUti and the BEAST 1.7. *Mol Biol Evol*. 2012;29:1969–73.
- 685 55. Darriba D, Taboada GL, Doallo R, Posada D. jModelTest2: more models, new  
686 heuristics and parallel computing. *Nat Methods*. 2012;9:772.
- 687 56. Baele G, Lemey P, Bedford T, Rambaut A, Suchard MA, Alekseyenko A V.  
688 Improving the accuracy of demographic and molecular clock model comparison while  
689 accommodating phylogenetic uncertainty. *Mol Biol Evol*. 2012;29:2157–67.
- 690 57. Baele G, Lemey P, Vansteelandt S. Make the most of your samples: Bayes factor  
691 estimators for high-dimensional models of sequence evolution. *BMC Bioinformatics*.

692 2013;14:85.

693 58. Krzywinski M, Schein J, Birol I, Connors J, Gascoyne R, Horsman D, et al.  
694 Circos: An information aesthetic for comparative genomics. *Genome Res.*  
695 2009;19:1639–45.

696 59. Siguier P, Perochon J, Lestrade L, Mahillon J, Chandler M. ISfinder: the reference  
697 centre for bacterial insertion sequences. *Nucleic Acids Res.* 2006;34 Database  
698 issue:D32-6.

699 **Figures**  
700

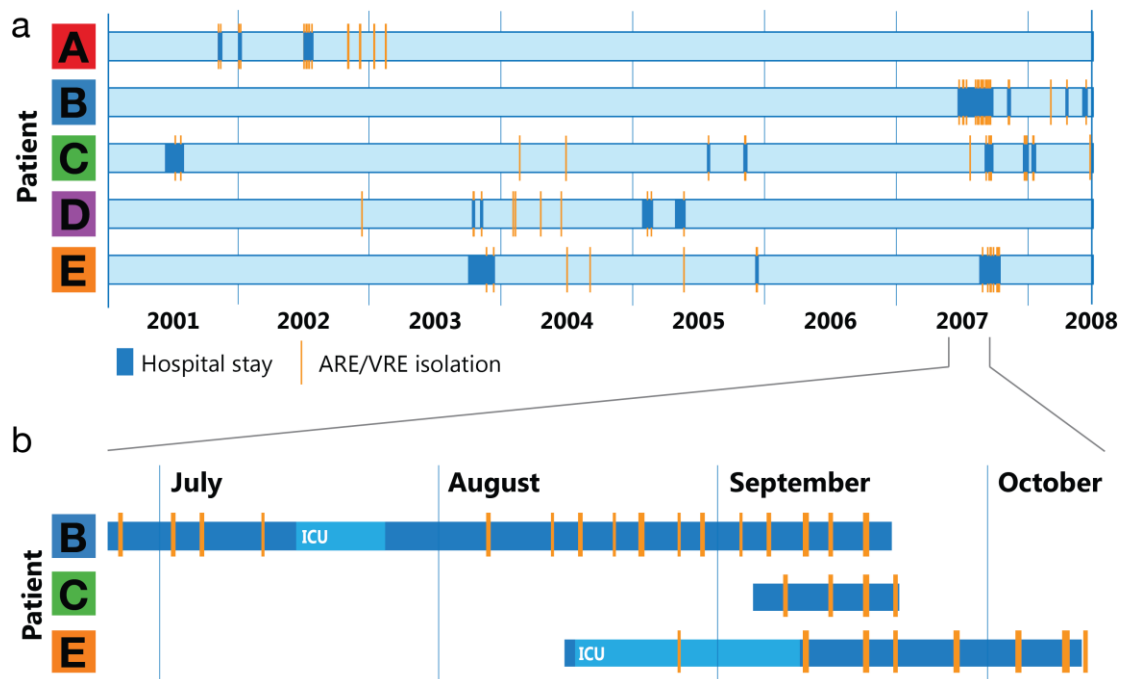

701  
702

703 **Figure 1:** (a) Timeline of hospital stay for 5 patients (A-E) and the time points at  
704 which multi-drug-resistant *E. faecium* strains were isolated during routine screening  
705 between 2001 and 2008. (b) Detail for patients B, C, and E, showing the overlap in  
706 their hospital stay in 2007 and the associated ARE/VRE isolations. Dark blue: patient  
707 hospital stay; orange: ARE/VRE-positive screening; ICU: patient in an intensive care  
708 unit. If an isolation time point does not overlap with hospital stay, the screening was  
709 performed at home as part of outbreak control studies.

710

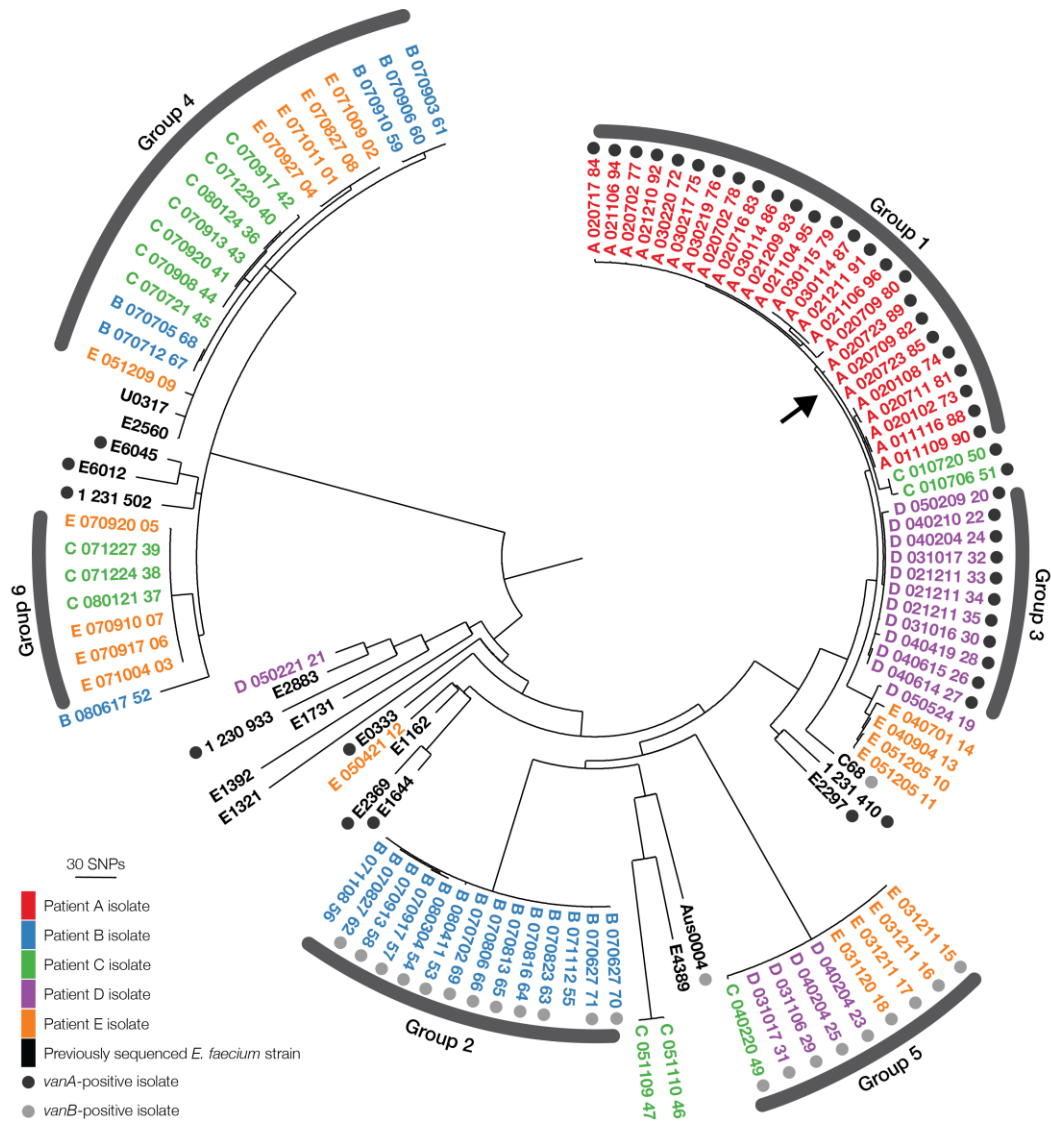

711  
712  
713  
714  
715  
716  
717  
718  
719  
720  
721  
722  
723  
724  
725

**Figure 2:** Phylogenetic tree of clade A1 isolates. This maximum-likelihood tree includes 95 of the 96 genome sequences generated in this study and 19 publicly available *E. faecium* genome sequences. The core genome alignment consisted of 2,295,725 nucleotides. The position of strain A\_020709\_82 is marked with an arrow. The genome of this isolate was sequenced and assembled to completion using a combination of short- and long-read sequencing for use as a reference genome in further analyses. Genome sequences are coded as follows: the letter represents the patient, the six number code represents the data of isolation in year-month-day format, the final number is the unique identifier for each genome sequence. Colours indicate the patient this isolate was taken from. Black and gray marks indicate the presence of the *vanA* or *vanB* vancomycin resistance operon in the genome, respectively.

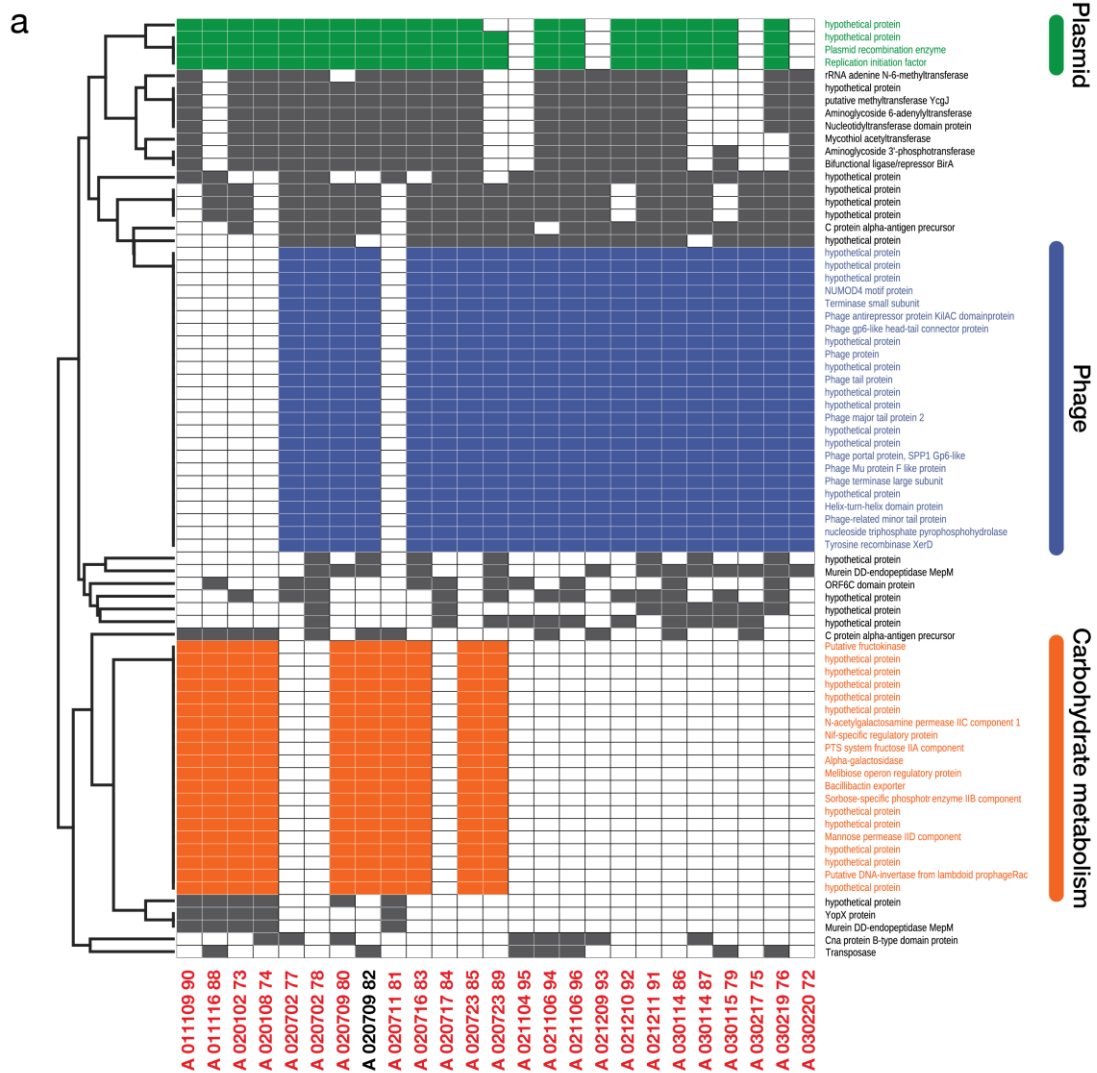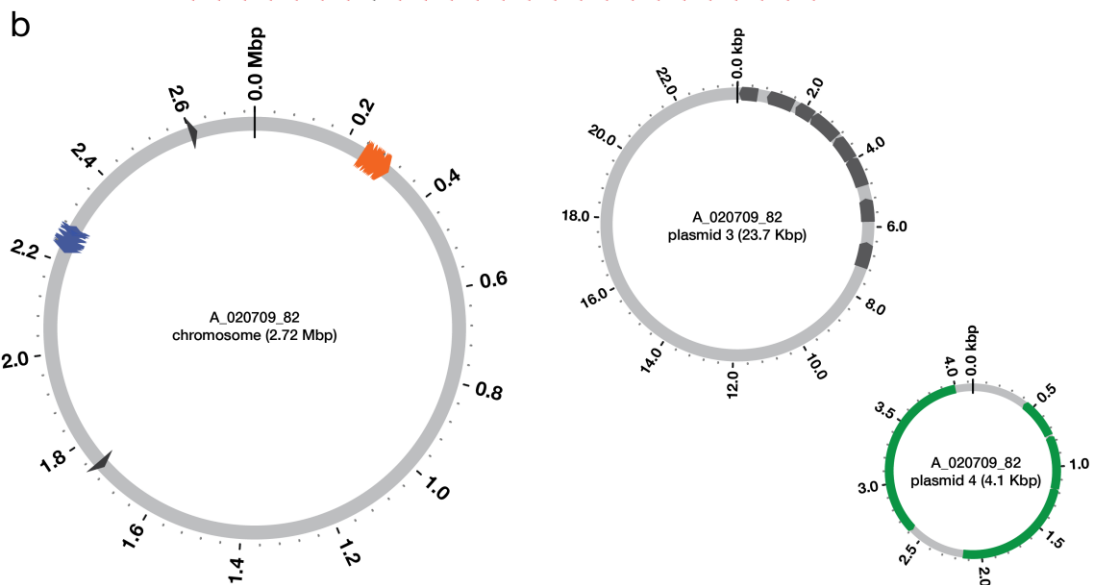



727 **Figure 3:** The accessory genome of group 1 isolates. (a) Plot showing the  
728 differentially present genes in the different isolates, ordered chronologically. Colours  
729 indicate gene clusters that are variably present or absent and are annotated on the  
730 basis of their predicted function or origin. (b) The differentially present genes mapped  
731 onto the A\_020709\_82 genome, with colours corresponding to gene clusters in panel  
732 a. Chromosome and plasmid sizes not shown to scale.  
733



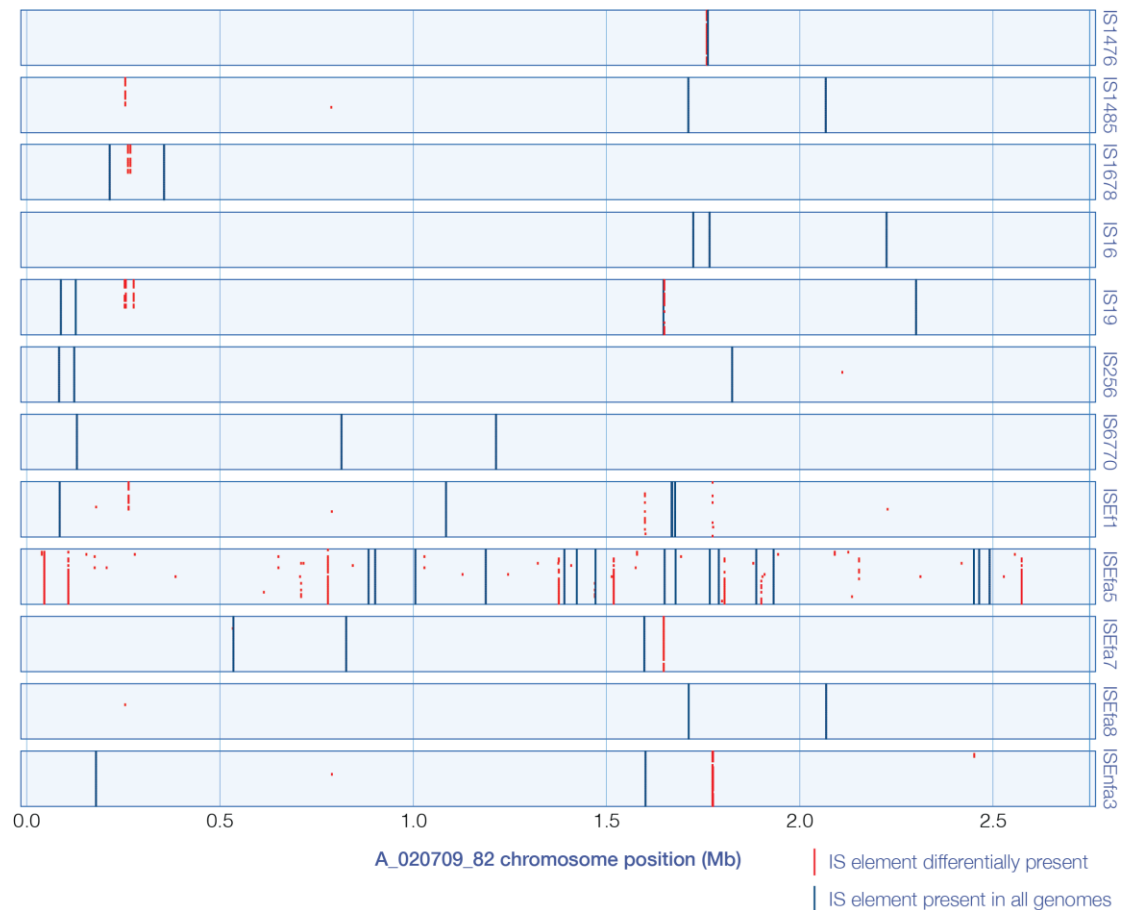

734  
735

736 **Figure 4:** Variable presence of IS elements in a clonal population of *E. faecium*  
737 during asymptomatic gut colonization. Overview of the different IS elements found in  
738 the genomes of the 25 clonal patient A isolates, plotted on the chromosomal  
739 sequence of isolate A\_020709\_82. A total of 12 different IS elements are found in this  
740 group. Blue marks indicate the presence of that IS-element in all isolates. Red marks  
741 indicate that the IS element is present in the indicated isolate, but not in all isolates.  
742 Each row of an individual IS element represents a single isolate, with the oldest  
743 isolate on top and the newest at the bottom.
